# Supplementary material
Source: publisher figshare collection journal article supplement (https://rs.figshare.com/ndownloader/files/13867958)
Supplement: Supplementary file 1 [file 13867958]

## Sheet: TableS1
Table S1. Demographic and sample collection information.
subject ID	Group	Elo rating	Age (years)	grooming rate (min/hr)	Sample collection date
482	WXC_SGE2	562	17.423	4.544	2014-09-09
RAa11	Aa11_SGE2	1588	10.1662	12.3205	2014-08-05
RAc8	VBB_SGE2	452	14.1932	4.48055	2014-11-18
RBc8	Bc8_SGE2	1502	14.1932	15.0941	2014-07-29
RCw10	Cw10_SGE2	1448	10.8648	17.1494	2014-09-15
RCy13	Bc8_SGE2	1024	5.10651	6.92053	2014-07-30
REg12	Fq9_SGE2	225	7.91716	9.57687	2014-08-12
RFd12	Aa11_SGE2	60	8.01304	4.44487	2014-08-06
RFm12	Cw10_SGE2	1018	7.16656	10.0432	2014-09-15
RFq9	Fq9_SGE2	1681	12.1331	7.85313	2014-08-12
RFs5	VBB_SGE2	357	19.094	5.93618	2014-10-28
RIa13	Pp10_SGE2	1412	6.22419	14.4854	2014-06-23
RIb12	Aa11_SGE2	587	8.07057	7.80767	2014-08-06
RIe12	Pp10_SGE2	1577	7.97743	13.7762	2014-06-25
RJf7	VBB_SGE2	1366	16.0286	16.0047	2014-10-30
RJj10	WXC_SGE2	1049	11.1606	5.50167	2014-09-08
RJl11	Jl11_SGE2	1492	9.16634	19.8918	2014-06-18
RJs11	Aa11_SGE2	1016	8.98006	6.14007	2014-08-05
RNi12	Jl11_SGE2	1642	7.77471	19.393	2014-06-18
ROn5	Ze12_SGE2	1643	19.2337	14.2001	2014-09-24
ROv12	WXC_SGE2	294	6.96932	3.87417	2014-09-08
RPj10	VBB_SGE2	1128	11.1524	9.91582	2014-10-30
RPm4	WXC_SGE2	1604	21.9567	11.6223	2014-09-08
RPp10	Pp10_SGE2	690	11.062	11.7203	2014-06-23
RPq11	Jl11_SGE2	781	9.04032	8.20069	2014-06-25
RPs7	Cw10_SGE2	655	15.0588	11.7243	2014-09-16
RPy12	Bc8_SGE2	122	6.86796	4.02833	2014-08-04
RQp9	Cw10_SGE2	1649	12.1414	13.617	2014-09-15
RRr13	Jl11_SGE2	116	5.75849	2.46738	2014-06-17
RSh11	Bc8_SGE2	1680	9.97173	13.5773	2014-07-29
RSi10	Ze12_SGE2	1462	11.1689	18.9154	2014-08-18
RSu10	Bc8_SGE2	563	10.947	8.2654	2014-08-04
RSu12	Fq9_SGE2	728	6.99397	6.2314	2014-08-11
RTf12	Aa11_SGE2	1749	7.93907	9.33653	2014-08-05
RUd14	Ze12_SGE2	698	5.01611	14.5416	2014-08-13
RUf11	Cw10_SGE2	230	10.032	3.45637	2014-09-16
RVb12	Pp10_SGE2	1144	8.05413	11.6161	2014-06-24
RVe12	Jl11_SGE2	1001	7.95825	11.5924	2014-06-19
RVq13	Fq9_SGE2	1448	5.86259	11.3589	2014-08-11
RVw12	Fq9_SGE2	918	6.90905	9.56667	2014-08-11
RWu12	Pp10_SGE2	177	6.99123	5.383	2014-06-24
RZe12	Ze12_SGE2	1072	7.95825	14.9194	2014-08-13
RZq10	Ze12_SGE2	255	10.947	8.972	2014-08-13
VBB	VBB_SGE2	1600	17.423	9.64527	2014-10-28
WXC	WXC_SGE2	1423	17.423	9.76217	2014-09-09

## Sheet: TableS2
Table S2: Summary statistics for RNA-seq data.
subject ID	cell type	total reads	uniquely mapped reads	mtDNA mapped reads	Number of sites with sufficient coverage (≥200 reads)	Number of polymorphic sites with sufficient coverage (≥200 reads)	Number of heteroplasmic sites
482	B	27922407	25365069	741379	16561	1050	2
482	Cytotoxic T	27011684	24655377	705845	16561	1050	1
482	Helper T	27542937	24951013	641531	16491	1050	2
482	Monocytes	21057345	17896694	705264	16561	1050	4
482	Natural killer	21763912	19461305	639068	16468	1050	1
RAa11	B	847839	744690	14207	12459	180	2
RAa11	Cytotoxic T	29993795	26830593	736886	16186	1045	21
RAa11	Helper T	21462336	18998380	346687	15963	1042	11
RAa11	Monocytes	28679970	24334605	1440643	16323	1045	18
RAa11	Natural killer	28622786	25197736	1149148	16221	1045	20
RAc8	B	27487629	24186944	429309	15962	1043	14
RAc8	Cytotoxic T	29515483	26164673	417671	15892	1044	11
RAc8	Helper T	33934968	29975808	496098	15905	1044	13
RAc8	Monocytes	24191636	21386229	372137	15794	1043	16
RAc8	Natural killer	21859094	19310312	274584	15753	1037	10
RBc8	B	23272631	20556236	387475	15990	1043	14
RBc8	Cytotoxic T	20630157	18521485	315377	15948	1041	12
RBc8	Helper T	25239004	22676138	381235	16022	1043	13
RBc8	Monocytes	31421239	26925726	608562	15982	1045	19
RBc8	Natural killer	28752110	25835199	383104	16038	1035	19
RCw10	B	24621341	22188527	853182	16561	1050	4
RCw10	Cytotoxic T	19998845	18131267	622223	16561	1050	4
RCw10	Helper T	27839058	25374832	805853	16561	1050	3
RCw10	Monocytes	19034225	16339356	680130	16561	1050	6
RCw10	Natural killer	18851329	17063430	617985	16483	1050	4
RCy13	B	22617095	20046917	733720	16561	1050	6
RCy13	Cytotoxic T	26044658	22978022	826815	16561	1050	6
RCy13	Helper T	20173544	17802716	598831	16561	1050	4
RCy13	Monocytes	25184015	21486217	1070028	16561	1050	6
RCy13	Natural killer	28916426	25910443	800400	16561	1050	4
REg12	B	20822798	19082913	888407	16561	1049	7
REg12	Cytotoxic T	20173982	18214571	679579	16561	1050	2
REg12	Helper T	20335528	18326986	579087	16561	1050	3
REg12	Monocytes	29611508	25011424	1263906	16561	1050	7
REg12	Natural killer	20565415	18806587	817591	16488	1050	8
RFd12	B	21121559	19289872	335558	15876	1038	7
RFd12	Cytotoxic T	21119270	19374663	282146	15837	1034	8
RFd12	Helper T	20149876	18294707	275578	15767	1036	5
RFd12	Monocytes	24242838	21629331	450753	15638	1042	14
RFm12	B	30713723	27770862	1078315	16561	1050	4
RFm12	Cytotoxic T	28111814	25584606	888724	16561	1050	4
RFm12	Helper T	28811601	25828292	727594	16545	1050	3
RFm12	Monocytes	25312632	22255159	856842	16561	1050	8
RFm12	Natural killer	20953851	19065080	624259	16561	1050	6
RFq9	B	19130611	17607465	938989	16561	1050	13
RFq9	Cytotoxic T	21490392	19625414	1224469	16561	1050	7
RFq9	Helper T	21404075	19169917	711549	16561	1050	4
RFq9	Monocytes	25694400	22051113	1082322	16561	1050	5
RFq9	Natural killer	29948859	27129357	1977792	16553	1050	11
RFs5	B	29144463	26706355	712266	16555	1050	2
RFs5	Cytotoxic T	28975742	26526688	950483	16561	1050	5
RFs5	Helper T	26662590	24355692	666147	16519	1050	4
RFs5	Monocytes	23654074	21174227	598360	16537	1045	5
RFs5	Natural killer	37198234	34136914	641776	16561	1050	9
RIa13	B	22799892	20543654	688829	16561	1050	4
RIa13	Cytotoxic T	23731740	21658910	429289	16561	1050	4
RIa13	Helper T	22878893	20655635	416742	16561	1050	4
RIa13	Monocytes	32187119	27739204	1031223	16561	1050	7
RIa13	Natural killer	26320441	23692867	588883	16561	1050	5
RIb12	Cytotoxic T	20688819	18880650	278159	15764	1036	8
RIb12	Helper T	20473086	18507534	250758	15784	1041	8
RIb12	Monocytes	28473027	24678603	543553	15558	1041	14
RIb12	Natural killer	25944993	22829407	528392	15890	1049	13
RIe12	B	20462461	17988212	456788	16561	1050	3
RIe12	Cytotoxic T	22202171	20175028	453788	16561	1050	4
RIe12	Helper T	21036594	18883642	464425	16561	1050	3
RIe12	Monocytes	24362331	20705310	639777	16561	1050	4
RIe12	Natural killer	22589187	20266853	448797	16561	1050	4
RJf	B	28843088	26555405	782567	16561	1050	2
RJf	Cytotoxic T	32284115	29545019	734036	16561	1050	3
RJf	Helper T	30808091	28214977	675419	16561	1050	3
RJf	Monocytes	36091663	31274335	1045374	16561	1050	5
RJf	Natural killer	22441659	20364922	608917	16561	1050	7
RJj10	B	23418330	21547649	649037	16551	1050	3
RJj10	Cytotoxic T	22752076	20983238	598234	16461	1050	4
RJj10	Helper T	27289217	25024430	668948	16473	1050	1
RJj10	Monocytes	32139563	28341003	1054090	16561	1050	7
RJj10	Natural killer	37524689	34386925	1096693	16494	1050	11
RJl11	Cytotoxic T	22621341	20300922	568864	16561	1050	7
RJl11	Helper T	22432282	19764750	852521	16561	1050	7
RJl11	Monocytes	23545057	20385496	811560	16561	1050	6
RJl11	Natural killer	26757777	23987025	789022	16561	1050	7
RJs11	B	22720948	20765771	886636	16561	1050	6
RJs11	Cytotoxic T	21322463	19479457	681905	16487	1050	3
RJs11	Helper T	26844030	24369450	900684	16493	1050	6
RNi12	Cytotoxic T	20503299	18318083	418304	16561	1050	3
RNi12	Helper T	20137315	17936876	352977	16561	1050	2
RNi12	Monocytes	27208464	23569357	764607	16561	1050	4
RNi12	Natural killer	24250891	21823174	621265	16561	1050	4
ROn5	B	31158182	28460201	953238	16561	1050	5
ROn5	Cytotoxic T	26514564	24123586	634658	16472	1050	2
ROn5	Helper T	26721293	24289618	571738	16468	1050	2
ROn5	Monocytes	49394757	43354110	1682495	16561	1050	9
ROn5	Natural killer	23175825	20997468	522947	16561	1050	5
ROv12	B	21364460	19134493	586405	16561	1050	7
ROv12	Cytotoxic T	20942202	19171459	580256	16467	1050	3
ROv12	Helper T	21947469	19986806	595395	16538	1050	2
ROv12	Monocytes	29393279	25580716	942792	16561	1050	10
ROv12	Natural killer	25812356	23048282	727822	16561	1050	6
RPj10	B	31798414	28549840	558163	15951	1050	15
RPj10	Cytotoxic T	35571726	30769593	667408	15974	1050	19
RPj10	Helper T	29681803	26900623	378576	15957	1033	8
RPj10	Monocytes	25323187	22576707	430942	15680	1050	14
RPj10	Natural killer	19630651	17706238	276429	15553	1026	14
RPm4	B	22030680	20302538	621387	16496	1050	4
RPm4	Cytotoxic T	20841590	19138022	495618	16471	1050	4
RPm4	Monocytes	31495109	25367808	842846	16561	1050	5
RPm4	Natural killer	28253486	25518430	642622	16561	1050	6
RPp10	B	22919602	21009254	530262	16561	1050	4
RPp10	Cytotoxic T	21174524	19040177	462359	16561	1050	3
RPp10	Helper T	23544152	21012817	501063	16561	1050	3
RPp10	Monocytes	27498771	24227323	671650	16561	1050	4
RPp10	Natural killer	26242874	23627056	589897	16561	1050	4
RPq11	B	23330137	20839536	505638	16561	1050	5
RPq11	Cytotoxic T	20004210	17848238	384530	16561	1050	4
RPq11	Helper T	23518339	21526370	464478	16471	1050	3
RPq11	Monocytes	25957618	21970435	701071	16561	1050	5
RPq11	Natural killer	27568978	25013800	613445	16561	1050	5
RPs7	B	25026779	22910749	779177	16561	1050	2
RPs7	Cytotoxic T	24540080	21863511	597709	16561	1050	3
RPs7	Helper T	29249230	25978229	635224	16561	1050	5
RPs7	Monocytes	28923254	25294945	1057530	16561	1050	7
RPs7	Natural killer	19211050	17371585	403939	16554	1049	4
RPy12	B	20226357	16830099	260171	16464	1049	1
RPy12	Cytotoxic T	22919919	18878972	356986	16561	1050	4
RPy12	Helper T	23405246	19437131	269797	16464	1050	4
RPy12	Monocytes	21527272	18016338	361002	16470	1048	2
RPy12	Natural killer	29852424	26315912	257228	16448	1043	2
RQp9	B	26039633	23559813	666552	16514	1050	4
RQp9	Cytotoxic T	26119847	23664167	759102	16537	1050	6
RQp9	Helper T	24723147	22348384	526460	16461	1050	3
RQp9	Monocytes	18542912	16073304	570965	16539	1050	4
RQp9	Natural killer	17373128	15688825	448508	16502	1050	3
RRr13	B	25249314	22549085	624797	16561	1050	3
RRr13	Cytotoxic T	22002809	19634461	533234	16561	1050	4
RRr13	Helper T	23837419	21343157	548366	16561	1050	3
RRr13	Natural killer	29645205	26913627	582514	16561	1050	3
RSh12	Cytotoxic T	24858642	21918035	654500	16561	1050	7
RSh12	Helper T	25098916	22417239	646531	16561	1050	4
RSh12	Monocytes	24450946	21501402	629979	16561	1050	5
RSh12	Natural killer	26691537	24461434	800552	16561	1050	4
RSi10	B	20508887	18887493	586289	16470	1050	6
RSi10	Cytotoxic T	23729142	21880859	487015	16459	1050	3
RSi10	Helper T	21389976	19656578	434740	16463	1050	3
RSi10	Monocytes	22140157	19167791	701652	16561	1050	6
RSi10	Natural killer	22047046	19907077	479215	16561	1049	5
RSu10	B	20956293	18012401	388038	16561	1050	3
RSu10	Cytotoxic T	23389085	19417878	254837	16465	1050	4
RSu10	Helper T	22278541	18837240	263537	16472	1049	2
RSu10	Monocytes	26564461	22864071	492750	16537	1050	4
RSu10	Natural killer	27394779	23252298	350679	16465	1050	3
RSu12	B	23593305	21634655	1038311	16561	1050	5
RSu12	Cytotoxic T	23070548	20447025	841137	16561	1050	4
RSu12	Helper T	21106332	18589988	715305	16561	1050	4
RSu12	Monocytes	22826057	18870406	1136890	16561	1050	5
RSu12	Natural killer	24111994	21794897	559802	16561	1050	5
RTf12	B	21382375	19596175	670284	16561	1050	1
RTf12	Cytotoxic T	22936882	21049296	721465	16561	1050	3
RTf12	Helper T	22421533	20562557	642094	16561	1050	2
RTf12	Monocytes	27232596	23079606	1198801	16561	1050	6
RTf12	Natural killer	26960793	24233571	1048352	16561	1050	4
RUd14	Cytotoxic T	20743250	18950007	687488	16561	1050	5
RUd14	Helper T	20220833	18388522	659856	16561	1050	4
RUd14	Monocytes	19680374	17065646	659582	16561	1050	5
RUd14	Natural killer	19926011	18017250	571122	16561	1050	7
RUf11	B	26288981	24035690	649959	16561	1050	2
RUf11	Cytotoxic T	26152872	23741381	603225	16554	1050	1
RUf11	Helper T	29714628	26882029	541710	16537	1050	1
RUf11	Monocytes	25927187	23416139	928487	16561	1050	6
RUf11	Natural killer	30176077	27246200	602878	16484	1050	2
RVb12	B	22130682	20176863	276073	15523	1044	13
RVb12	Cytotoxic T	21839589	19743132	217958	15777	1030	9
RVb12	Helper T	24628957	22003917	331810	15550	1044	15
RVb12	Monocytes	23291866	20246382	326313	15483	1044	12
RVb12	Natural killer	24232664	22041876	294172	15475	1033	15
RVe12	B	17887608	15793775	404527	16561	1047	5
RVe12	Cytotoxic T	18754775	16545097	448308	16561	1050	4
RVe12	Helper T	19299534	16955973	481103	16561	1049	3
RVe12	Monocytes	26680401	22694198	669746	16561	1050	5
RVe12	Natural killer	24756476	22239701	541477	16561	1050	3
RVq13	B	21272819	19415339	1059679	16561	1050	6
RVq13	Cytotoxic T	21562409	19759597	830951	16561	1050	2
RVq13	Helper T	23891401	20919887	801206	16561	1050	4
RVq13	Monocytes	29241172	25064646	1144591	16561	1050	5
RVq13	Natural killer	27053301	24660391	983229	16488	1050	7
RVw12	B	21305626	19101384	751843	16561	1050	4
RVw12	Cytotoxic T	21984372	20333274	799497	16494	1050	6
RVw12	Helper T	22578826	20657496	1013407	16561	1050	6
RVw12	Monocytes	26902304	22673421	1227787	16480	1050	8
RVw12	Natural killer	15907932	14436644	334209	16561	1029	8
RWu12	B	20416132	18242655	460038	16561	1050	4
RWu12	Cytotoxic T	21957500	19269222	557061	16561	1050	4
RWu12	Helper T	27204319	23978761	637946	16561	1050	4
RWu12	Monocytes	22895535	20035881	726084	16561	1050	5
RWu12	Natural killer	27525382	24694044	484842	16504	1050	4
RZe12	B	22428999	20641680	1633228	16561	1050	4
RZe12	Cytotoxic T	21067964	18803321	755393	16561	1050	4
RZe12	Helper T	22197505	19959182	722073	16561	1050	7
RZe12	Monocytes	29044769	25261170	1276562	16561	1050	9
RZe12	Natural killer	19081516	17252990	737748	16561	1050	5
RZq10	B	23341112	21504118	848460	16561	1050	6
RZq10	Cytotoxic T	21943627	19653123	708926	16561	1050	5
RZq10	Helper T	20558350	18854551	546424	16468	1050	2
RZq10	Monocytes	30778992	27712305	1042241	16561	1050	5
RZq10	Natural killer	32092188	29490209	970236	16533	1050	11
VBB	B	30008069	27482957	769310	16556	1050	3
VBB	Cytotoxic T	28750323	26403174	548027	16469	1050	6
VBB	Helper T	32759885	30263077	547543	16467	1047	3
VBB	Monocytes	21789613	17409988	363098	16474	1049	3
VBB	Natural killer	23861318	21862132	376403	16482	1034	4
WXC	B	23633235	21620809	451882	15940	1042	13
WXC	Cytotoxic T	28288142	25313916	425945	15922	1050	12
WXC	Helper T	29241939	26016705	421453	15892	1050	12
WXC	Monocytes	20382460	17665796	381870	15602	1046	14
WXC	Natural killer	20077892	17807099	314555	15698	1044	13

## Sheet: TableS3
Table S3. Rates of received aggression and rates of submission do not predict mtDNA copy number
Note: each behavioral variable listed below was run in a separate model, controlling for age, cell type, and qPCR batch
Covariate	Coefficient (ß)	Standard error	p-value
aggression given (events/hr)	-0.00287513	0.0130286	0.83
non-contact threats (events/hr)	-0.00483678	0.0140081	0.73
submissions given (events/hr)	-0.00773873	0.00487945	0.11
withdrawals (events/hr)	-0.00790802	0.00581272	0.8

## Sheet: TableS4
Table S4. Dominance rank does not predict rates of heteroplasmy.
Covariate	Coefficient (ß)	Standard error	p-value
Dominance rank	9e-05	0.0001	0.431
Age	–0.0016	0.016	0.918

## Sheet: TableS5
Table S5. Grooming behavior does not predict rates of heteroplasmy.
Covariate	Coefficient (ß)	Standard error	p-value
Grooming	0.0081	0.0114	0.477
Age	–0.0021	0.0143	0.883

## Sheet: Table S6
Table S6. Modeling heteroplasmy with PCR duplicates removed.
Covariate	Coefficient (ß)	Standard error	p-value
Dominance rank	–0.00005	0.00011	0.68
Age	0.0241	0.0159	0.13
Covariate	Coefficient (ß)	Standard error	p-value
Grooming	0.0115	0.0109	0.29
Age	0.0274	0.0118	0.02
